# Supplementary material
Source: PubMed Central journal article supplement (PMC521946)
Supplement: pnas_101_40_14551__1.pdf [file pnas_101_40_14551__1.pdf]

**Table 1. The effect of fatal terror incidents on logged traffic volume during peak and off-peak hours**

| Variables*             | Peak traffic volume |       | Off-peak traffic volume |       |
|------------------------|---------------------|-------|-------------------------|-------|
|                        | exp(b)              | P> t  | exp(b)                  | P> t  |
| <b>2002</b>            | 1.022               | 0.206 | 1.023                   | 0.051 |
| <b>February</b>        | 1.019               | 0.517 | 1.017                   | 0.407 |
| <b>March</b>           | 1.013               | 0.643 | 1.036                   | 0.075 |
| <b>April</b>           | 0.993               | 0.814 | 1.042                   | 0.037 |
| <b>May</b>             | 0.997               | 0.927 | 1.063                   | 0.002 |
| <b>June</b>            | 1.004               | 0.889 | 1.018                   | 0.372 |
| <b>July</b>            | 1.012               | 0.738 | 1.067                   | 0.007 |
| <b>August</b>          | 1.002               | 0.965 | 1.067                   | 0.008 |
| <b>September</b>       | 0.895               | 0.002 | 0.970                   | 0.230 |
| <b>October</b>         | 0.960               | 0.249 | 1.016                   | 0.519 |
| <b>November</b>        | 1.042               | 0.247 | 0.990                   | 0.678 |
| <b>December</b>        | 1.046               | 0.202 | 1.035                   | 0.163 |
| <b>Sunday</b>          | 1.014               | 0.504 | 0.998                   | 0.874 |
| <b>Thursday</b>        | 0.973               | 0.176 | 1.050                   | 0.000 |
| <b>Friday</b>          | 0.686               | 0.000 | 0.980                   | 0.139 |
| <b>Saturday</b>        | 0.514               | 0.000 | 0.912                   | 0.000 |
| <b>Holiday</b>         | 0.714               | 0.000 | 0.918                   | 0.000 |
| <b>Incident Day 0</b>  | 1.010               | 0.629 | 0.990                   | 0.504 |
| <b>Incident Day +1</b> | 1.005               | 0.799 | 1.005                   | 0.711 |
| <b>Incident Day +2</b> | 0.975               | 0.233 | 0.982                   | 0.210 |
| <b>Incident Day +3</b> | 0.953               | 0.021 | 0.973                   | 0.058 |
| <b>Incident Day +4</b> | 0.974               | 0.218 | 0.988                   | 0.428 |
| <b>Incident Day +5</b> | 0.975               | 0.232 | 0.996                   | 0.793 |
| <b>Constant</b>        | 5975.613            | 0.000 | 3618.678                | 0.000 |
| <b>Number of Cases</b> | 532                 |       | 532                     |       |
| <b>Adjusted-R2</b>     | 0.7422              |       | 0.1723                  |       |
| <b>F( 23, 508)</b>     | 67.48               |       | 5.81                    |       |

\*Reference categories for the categorical variables are January and midweek days (Monday, Tuesday, and Wednesday).
