# Supplementary material
Source: PubMed Central journal article supplement (PMC521946)
Supplement: pnas_101_40_14551__2.pdf [file pnas_101_40_14551__2.pdf]

**Table 2. The effect of large terror incidents on logged traffic volume during peak and off-peak hours**

| Variables*             | Peak traffic volume |       | Off-peak traffic volume |       |
|------------------------|---------------------|-------|-------------------------|-------|
|                        | exp(b)              | P> t  | exp(b)                  | P> t  |
| <b>2002</b>            | 1.025               | 0.148 | 1.029                   | 0.012 |
| <b>February</b>        | 1.017               | 0.558 | 1.015                   | 0.439 |
| <b>March</b>           | 1.019               | 0.509 | 1.046                   | 0.021 |
| <b>April</b>           | 0.991               | 0.764 | 1.044                   | 0.027 |
| <b>May</b>             | 1.003               | 0.916 | 1.069                   | 0.000 |
| <b>June</b>            | 1.025               | 0.414 | 1.038                   | 0.069 |
| <b>July</b>            | 1.015               | 0.664 | 1.072                   | 0.004 |
| <b>August</b>          | 1.018               | 0.622 | 1.084                   | 0.001 |
| <b>September</b>       | 0.891               | 0.001 | 0.970                   | 0.215 |
| <b>October</b>         | 0.955               | 0.183 | 1.015                   | 0.543 |
| <b>November</b>        | 1.042               | 0.238 | 0.992                   | 0.737 |
| <b>December</b>        | 1.066               | 0.080 | 1.058                   | 0.024 |
| <b>Sunday</b>          | 1.014               | 0.492 | 0.996                   | 0.790 |
| <b>Thursday</b>        | 0.970               | 0.127 | 1.048                   | 0.001 |
| <b>Friday</b>          | 0.683               | 0.000 | 0.978                   | 0.110 |
| <b>Saturday</b>        | 0.513               | 0.000 | 0.911                   | 0.000 |
| <b>Holiday</b>         | 0.717               | 0.000 | 0.920                   | 0.000 |
| <b>Incident Day 0</b>  | 0.959               | 0.378 | 0.924                   | 0.015 |
| <b>Incident Day +1</b> | 0.938               | 0.199 | 0.968                   | 0.332 |
| <b>Incident Day +2</b> | 0.926               | 0.101 | 0.901                   | 0.001 |
| <b>Incident Day +3</b> | 0.866               | 0.002 | 0.921                   | 0.011 |
| <b>Incident Day +4</b> | 0.973               | 0.560 | 0.981                   | 0.560 |
| <b>Incident Day +5</b> | 0.977               | 0.634 | 0.974                   | 0.426 |
| <b>Constant</b>        | 5921.423            | 0.000 | 3590.031                | 0.000 |
| <b>Number of Cases</b> | 532                 |       | 532                     |       |
| <b>Adjusted-R2</b>     | 0.7446              |       | 0.1986                  |       |
| <b>F( 23, 508)</b>     | 68.30               |       | 6.72                    |       |

\*Reference categories for the categorical variables are January and Midweek days (Monday, Tuesday, and Wednesday).
