# Supplementary material
Source: PubMed Central journal article supplement (PMC521946)
Supplement: pnas_101_40_14551__3.pdf [file pnas_101_40_14551__3.pdf]

**Table 3. The effect of fatal terror incidents on accident casualty rates by accident type**

| Variables*             | Light accidents  |       | Serious accidents |       | Fatal accidents |       |
|------------------------|------------------|-------|-------------------|-------|-----------------|-------|
|                        | IRR <sup>†</sup> | P> t  | IRR               | P> t  | IRR             | P> t  |
| <b>2002</b>            | 1.038            | 0.028 | 0.996             | 0.930 | 1.038           | 0.721 |
| <b>February</b>        | 0.999            | 0.962 | 0.924             | 0.347 | 1.002           | 0.991 |
| <b>March</b>           | 0.984            | 0.561 | 1.055             | 0.512 | 0.896           | 0.544 |
| <b>April</b>           | 0.939            | 0.029 | 1.160             | 0.065 | 0.918           | 0.642 |
| <b>May</b>             | 0.952            | 0.074 | 1.128             | 0.120 | 0.983           | 0.921 |
| <b>June</b>            | 1.006            | 0.831 | 1.190             | 0.030 | 1.541           | 0.009 |
| <b>July</b>            | 0.948            | 0.127 | 1.259             | 0.014 | 1.111           | 0.623 |
| <b>August</b>          | 0.954            | 0.178 | 1.034             | 0.734 | 1.315           | 0.179 |
| <b>September</b>       | 0.958            | 0.241 | 1.106             | 0.324 | 1.104           | 0.655 |
| <b>October</b>         | 0.955            | 0.204 | 1.112             | 0.285 | 1.539           | 0.031 |
| <b>November</b>        | 0.971            | 0.402 | 1.015             | 0.882 | 1.302           | 0.203 |
| <b>December</b>        | 0.922            | 0.023 | 1.004             | 0.967 | 1.506           | 0.039 |
| <b>Sunday</b>          | 1.074            | 0.000 | 1.058             | 0.319 | 0.976           | 0.838 |
| <b>Thursday</b>        | 1.023            | 0.246 | 1.066             | 0.250 | 1.074           | 0.539 |
| <b>Friday</b>          | 1.133            | 0.000 | 1.399             | 0.000 | 1.314           | 0.017 |
| <b>Saturday</b>        | 1.081            | 0.000 | 1.522             | 0.000 | 1.354           | 0.013 |
| <b>Holiday</b>         | 1.070            | 0.059 | 1.065             | 0.525 | 1.318           | 0.178 |
| <b>Incident Day 0</b>  | 1.009            | 0.676 | 0.954             | 0.428 | 1.031           | 0.802 |
| <b>Incident Day +1</b> | 0.944            | 0.007 | 0.981             | 0.749 | 0.926           | 0.541 |
| <b>Incident Day +2</b> | 0.985            | 0.470 | 0.915             | 0.139 | 1.102           | 0.414 |
| <b>Incident Day +3</b> | 1.028            | 0.191 | 1.001             | 0.984 | 1.348           | 0.007 |
| <b>Incident Day +4</b> | 1.012            | 0.585 | 1.035             | 0.552 | 0.919           | 0.516 |
| <b>Incident Day +5</b> | 1.000            | 0.999 | 0.975             | 0.676 | 1.111           | 0.380 |
| <b>Number of Cases</b> | 532              |       | 532               |       | 532             |       |
| <b>Log Likelihood</b>  | -1880.3          |       | -1173.3           |       | -742.6          |       |

\*Reference categories for the categorical variables are January and midweek days (Monday, Tuesday, and Wednesday).

<sup>†</sup>Coefficients are reported as incident rate ratios.
