# Supplementary material
Source: PubMed Central journal article supplement (PMC521946)
Supplement: pnas_101_40_14551__4.pdf [file pnas_101_40_14551__4.pdf]

**Table 4. The effect of large fatal terror incidents on accident casualty rates by accident type**

| Variables*             | Light accidents  |       | Serious accidents |       | Fatal accidents |       |
|------------------------|------------------|-------|-------------------|-------|-----------------|-------|
|                        | IRR <sup>†</sup> | P> t  | IRR               | P> t  | IRR             | P> t  |
| <b>2002</b>            | 1.044            | 0.010 | 0.987             | 0.787 | 1.076           | 0.471 |
| <b>February</b>        | 0.996            | 0.878 | 0.916             | 0.296 | 1.016           | 0.930 |
| <b>March</b>           | 0.992            | 0.775 | 1.041             | 0.622 | 0.934           | 0.706 |
| <b>April</b>           | 0.941            | 0.035 | 1.161             | 0.063 | 0.943           | 0.748 |
| <b>May</b>             | 0.957            | 0.109 | 1.132             | 0.111 | 0.982           | 0.918 |
| <b>June</b>            | 1.016            | 0.592 | 1.193             | 0.033 | 1.523           | 0.014 |
| <b>July</b>            | 0.952            | 0.155 | 1.257             | 0.014 | 1.122           | 0.591 |
| <b>August</b>          | 0.966            | 0.322 | 1.039             | 0.699 | 1.317           | 0.183 |
| <b>September</b>       | 0.958            | 0.236 | 1.092             | 0.386 | 1.153           | 0.516 |
| <b>October</b>         | 0.957            | 0.214 | 1.095             | 0.356 | 1.619           | 0.014 |
| <b>November</b>        | 0.972            | 0.418 | 1.006             | 0.949 | 1.333           | 0.163 |
| <b>December</b>        | 0.939            | 0.085 | 1.012             | 0.910 | 1.561           | 0.028 |
| <b>Sunday</b>          | 1.084            | 0.000 | 1.060             | 0.296 | 0.993           | 0.951 |
| <b>Thursday</b>        | 1.022            | 0.256 | 1.077             | 0.181 | 1.069           | 0.565 |
| <b>Friday</b>          | 1.132            | 0.000 | 1.405             | 0.000 | 1.322           | 0.014 |
| <b>Saturday</b>        | 1.084            | 0.000 | 1.516             | 0.000 | 1.343           | 0.015 |
| <b>Holiday</b>         | 1.073            | 0.051 | 1.075             | 0.469 | 1.290           | 0.212 |
| <b>Incident Day 0</b>  | 0.967            | 0.500 | 1.063             | 0.639 | 1.149           | 0.596 |
| <b>Incident Day +1</b> | 0.823            | 0.000 | 0.846             | 0.272 | 0.788           | 0.445 |
| <b>Incident Day +2</b> | 1.068            | 0.160 | 0.924             | 0.570 | 1.036           | 0.893 |
| <b>Incident Day +3</b> | 0.934            | 0.176 | 1.010             | 0.944 | 1.689           | 0.018 |
| <b>Incident Day +4</b> | 0.988            | 0.806 | 1.180             | 0.175 | 0.621           | 0.142 |
| <b>Incident Day +5</b> | 0.996            | 0.942 | 0.767             | 0.083 | 0.998           | 0.995 |
| <b>Number of Cases</b> | 532              |       | 532               |       | 532             |       |
| <b>Log Likelihood</b>  | -1876.2          |       | -1171.5           |       | -743.4          |       |

\*Reference categories for the categorical variables are January and midweek days (Monday, Tuesday, and Wednesday).

†Coefficients are reported as incident rate ratios.
